# Supplementary material
Source: publisher figshare collection journal article supplement (https://asha.figshare.com/articles/dataset/_/19855639)
Supplement: Supplementary file 1 [file 1]

**Supplemental Material S2.** Questionnaire for preceptors in audiology practicum (Google form).

*The questions marked with a star were added to the questionnaires for preceptors who responded to the survey during COVID-19.*

This survey is intended for preceptors of audiology practicum in the different academic institutions in Israel.

The questions pertaining to supervision during COVID-19 are only to be answered if supervision was conducted during COVID-19 in an audiology clinical practicum in one of the academic programs in Israel.

The purpose of this survey is to evaluate the perceptions of clinical audiology preceptors of what may improve students' practicum.

The questionnaire is anonymous.

On questions featuring a scale, 1 = lowest rating, *a little*, and 7 = highest rating, *a lot*, please mark the appropriate number. For questions without a scale, please select the most suitable answer or choose "other" and write in your answer.

Demographics:

1. Age: \_\_\_\_\_
2. How many years have you been supervising audiology practicum?
3. How many years have you been an audiologist?
4. In what setting do you supervise students? Please mark all the correct options:  
health maintenance organization clinic / hospital / private clinic / academic  
institution clinic / remote supervision\* / physically in the testing booth\* / briefly  
in the testing booth\* / remotely through video camera near the testing booth\* /  
other \_\_\_\_\_
5. To what degree did you feel sufficiently protected from contracting COVID-19 at your  
practicum placement? 1 2 3 4 5 6 7\*

The following questions pertain to the theoretical courses and clinical practicum

6. To what degree did you feel the students had command of the theoretical knowledge  
needed for practicum (this semester\*)/clinical work? 1 2 3 4 5 6 7\*
7. To what degree does the practicum exhibit a gradual progression?  
Previous semester: 1 2 3 4 5 6 7\*  
Present semester 1 2 3 4 5 6 7\*
8. How varied are the practicum placements?  
Previous semester: 1 2 3 4 5 6 7\*  
Present semester 1 2 3 4 5 6 7\*
9. To what degree are the students exposed to a variety of audiological cases?

Previous semester: 1 2 3 4 5 6 7

Present semester 1 2 3 4 5 6 7

**The following questions pertain to clinical practicum and supervision**

10. To what degree do you feel that the supervision is efficient? 1 2 3 4 5 6 7

11. In what way and to what degree did you feel a change in the quality of supervision during COVID-19 in the following areas? (on a scale from 1-7)\*

- a. Students' independence
- b. Proficiency with instruments (audiometer, etc.)
- d. Integration of results
- e. Quality of supervision
- f. Number of hearing tests performed
- g. Number of practicum days

12. What do you feel could improve the practicum? (you can choose more than one option)

More practicum days / more hours of practicum a day / more breaks during practicum / smaller groups of students / more hearing tests / more variety of hearing tests cases / more variety of different tests (behavior, immittance, ABR, etc.) / more specific feedback / different practicum placements / more intervention from preceptors / less intervention of preceptors / other \_\_\_\_\_
