# Supplementary material
Source: publisher figshare collection journal article supplement (https://asha.figshare.com/articles/dataset/_/19855639)
Supplement: Supplementary file 2 [file 1]

**Supplemental Material S3.** Questionnaire for newly graduated audiologists regarding audiology practicum (Google form).

This survey is intended for newly qualified audiologists who graduated a communication disorders BA program in Israel in the past three years and are currently working in audiology.

The purpose of this survey is to evaluate newly graduated audiologists' perception of their competency to work in the various fields of audiology, and which features might be improved in the clinical practicum in the academic programs in Israel.

The questionnaire is anonymous.

On questions featuring a scale, 1 = lowest rating, *a little*, and 7 = highest rating, *a lot*, please mark the appropriate number. For questions without a scale, please select the most suitable answer or choose "other" and write in your answer.

Demographics:

1. Age: \_\_\_\_

2 Academic institution at which you graduated with a BA:

Ariel University / Haifa University / Hadassah Academic College / Ono  
Academic College / Tel Aviv University

3. How many years have you been working as an audiologist: 1 / 2 / 3

The following questions pertain to the **theoretical courses**:

4. How would you rate your command of the theoretical knowledge needed for clinical work? 1 2 3 4 5 6 7

The following questions pertain to **clinical practicum** and the supervision you received:

5. To what degree did you experience gradual progression of the practicum?  
1 2 3 4 5 6 7

6. To what degree were the practicum placements varied? 1 2 3 4 5 6 7

7. How would you rate the efficacy of the supervision you received during your clinical practicum? 1 2 3 4 5 6 7

8. To what degree did you feel your sense of capability was developed during the practicum?  
1 2 3 4 5 6 7

9. What was the degree of intervention of preceptors while you were conducting hearing tests? 1 2 3 4 5 6 7

10. What do you feel could improve the clinical practicum?

More clinic hours / more variety of placements / more professional supervision /  
more personal supervision / other \_\_\_\_\_

11. What do you feel could improve the supervision process (you can choose more than one option)?

more practicum days / more hours of practicum / more breaks during practicum /  
smaller groups of students / more hearing tests / more variety of cases for hearing  
tests / more variety of different tests (behavioral, admittance, ABR, etc.) /

different practicum placements / more intervention by preceptors / less  
intervention by preceptors / other \_\_\_\_\_

12. How would you rate the practicum as preparing you for your clinical work?

1 2 3 4 5 6 7
