# Supplementary material
Source: publisher figshare collection journal article supplement (https://asha.figshare.com/articles/dataset/_/19855639)
Supplement: Supplementary file 3 [file 1]

### **Supplemental Material S1.** Questionnaire for students regarding audiology practicum.

This survey is intended for students who had their audiology practicum during COVID-19 and are currently studying in an academic communication disorder program in Israel.

The purpose of this survey is to evaluate students' perception of their preparedness to continue their audiology practicum in the different academic settings in Israel and what aspects of the practicum could be improved.

The questionnaire is anonymous.

On questions featuring a scale, 1 = lowest rating, *a little*, and 7 = highest rating, *a lot*, please mark the appropriate number. For questions without a scale, please select the most suitable answer or choose "other" and write in your answer.

#### Demographics:

1. Age: \_\_\_\_\_
2. Academic Institution at which you are currently studying:  
Achva Academic College / Ariel University / Haifa University / Hadassah  
Academic College / Ono Academic College / Tel Aviv University
3. In which year are you currently studying: 2<sup>nd</sup> / 3<sup>rd</sup> / 4<sup>th</sup>
4. To what degree did you feel protected from contracting COVID-19 in your practicum placement?  
Previous semester: 1 2 3 4 5 6 7  
Present semester: 1 2 3 4 5 6 7

#### The following questions pertain to the **theoretical courses** in the previous semester (in comparison to on-campus classes):

5. How would you rate your command of theoretical knowledge needed for clinical practicum/work? 1 2 3 4 5 6 7

#### The following questions pertain to **clinical practicum** and the supervision received **during COVID-19**:

Please answer separately for each semester.

If the question is not relevant for you, please choose "not relevant."

6. To what degree did you experience gradual progression of the practicum?  
Previous semester: 1 2 3 4 5 6 7 not relevant  
Present semester: 1 2 3 4 5 6 7 not relevant
7. To what degree were the practicum placements varied?  
Previous semester: 1 2 3 4 5 6 7 not relevant  
Present semester: 1 2 3 4 5 6 7 not relevant
8. To what degree were you exposed to a variety of audiological cases?  
Previous semester: 1 2 3 4 5 6 7 not relevant  
Present semester: 1 2 3 4 5 6 7 not relevant
9. How would you rate the efficacy of the supervision you received during your clinical practicum?  
Previous semester: 1 2 3 4 5 6 7 not relevant

- Present semester: 1 2 3 4 5 6 7 not relevant
10. To what degree did you feel your sense of capability was developed during practicum?  
Previous semester: 1 2 3 4 5 6 7 not relevant  
Present semester: 1 2 3 4 5 6 7 not relevant
11. Degree of intervention of preceptors while conducting hearing tests?  
Previous semester: 1 2 3 4 5 6 7 not relevant  
Present semester: 1 2 3 4 5 6 7 not relevant
12. How satisfied were you with the supervision you received?  
Previous semester: 1 2 3 4 5 6 7 not relevant  
Present semester: 1 2 3 4 5 6 7 not relevant
13. To what degree were you exposed to a variety of audiological cases?  
Previous semester: 1 2 3 4 5 6 7 not relevant  
Present semester: 1 2 3 4 5 6 7 not relevant
14. To what degree do you feel that the hours of clinical practicum were sufficient during COVID-19?  
Previous semester: 1 2 3 4 5 6 7 not relevant  
Present semester: 1 2 3 4 5 6 7 not relevant
15. In what way and to what degree did you feel a change in the quality of supervision in the following areas? (on a scale from 1 - *a significantly negative change*, to 7 - *a significant positive change*)
- a. Student independence 1 2 3 4 5 6 7
  - b. Proficiency with instruments (audiometer, etc.) 1 2 3 4 5 6 7
  - c. Integration of results 1 2 3 4 5 6 7
16. What do you feel could improve the practicum and supervision during COVID-19? (you can choose more than one option)
- More practicum days / more hours of practicum / more breaks during practicum / smaller groups of students / more hearing tests / more variety of hearing tests cases / more variety of different tests (behavior, admittance, ABR, etc.) / different practicum placements / more intervention from preceptors / less intervention of preceptors / other\_\_\_\_\_
17. How would you rate the practicum as preparing you for clinical work (in the various fields)?
- 1 2 3 4 5 6 7
